# Supplementary material for: Using genetics to uncouple higher adiposity from its adverse metabolic effects and understand its role in metabolic and non-metabolic disease.
Source: Research Square preprint supplement (doi:10.21203/rs.3.rs-537397/v1), 2021-05-25

# Supplementary Figure 1

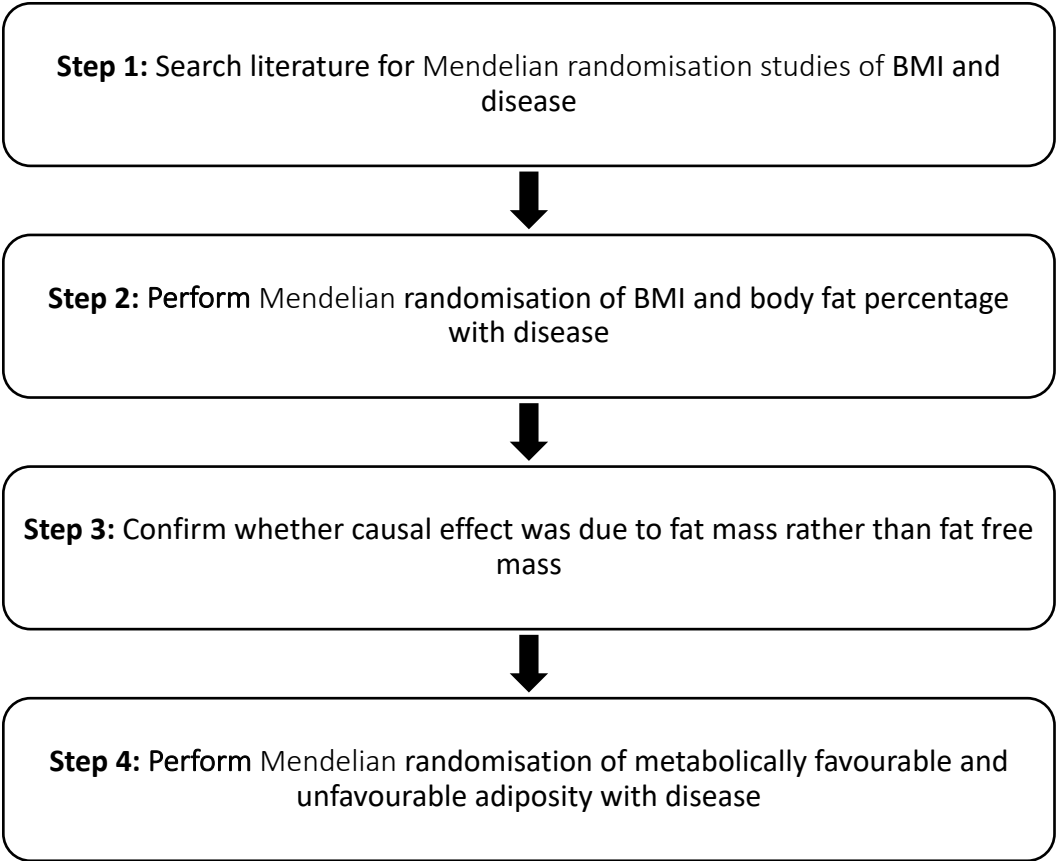

**Step 5:** Identify whether evidence of metabolic, non-metabolic, combination (predominantly metabolic) or combination (predominantly non-metabolic) causal effect

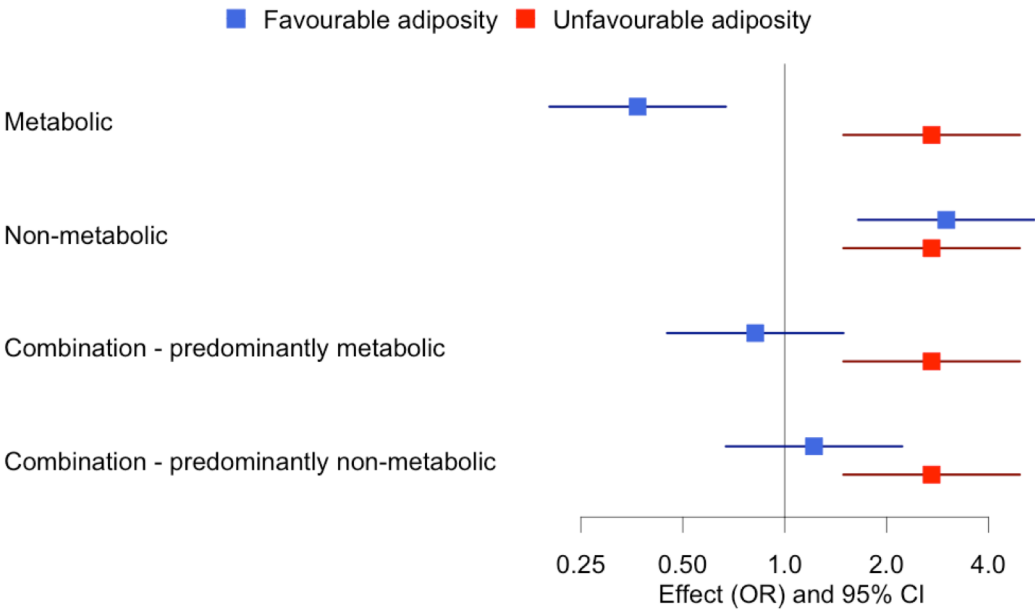

Supplementary Figure 2a

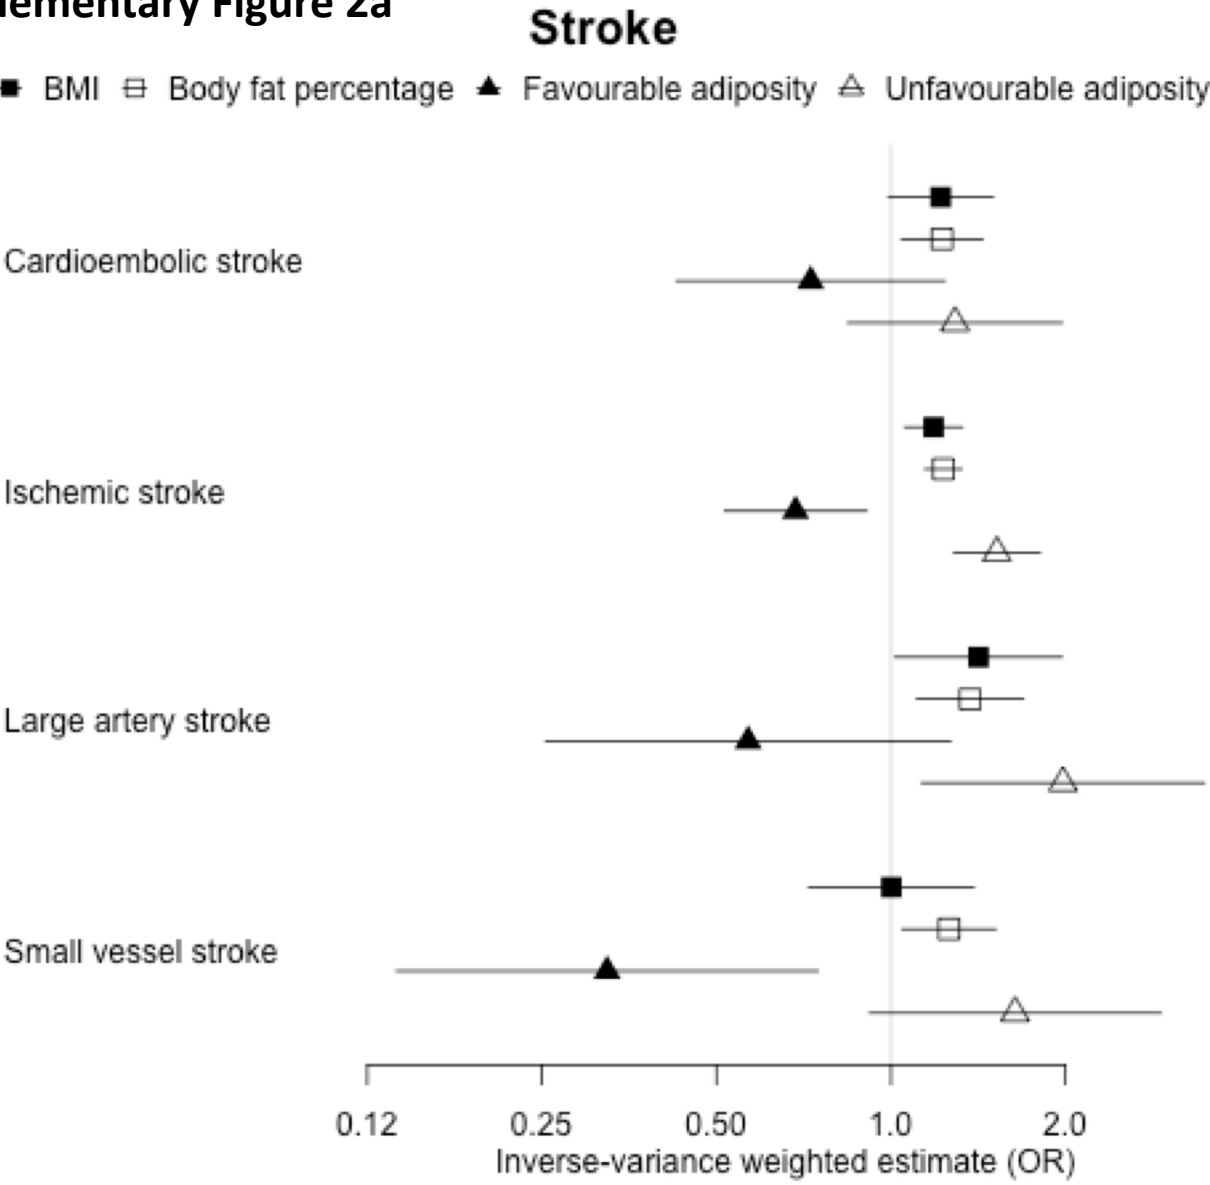

Supplementary Figure 2b

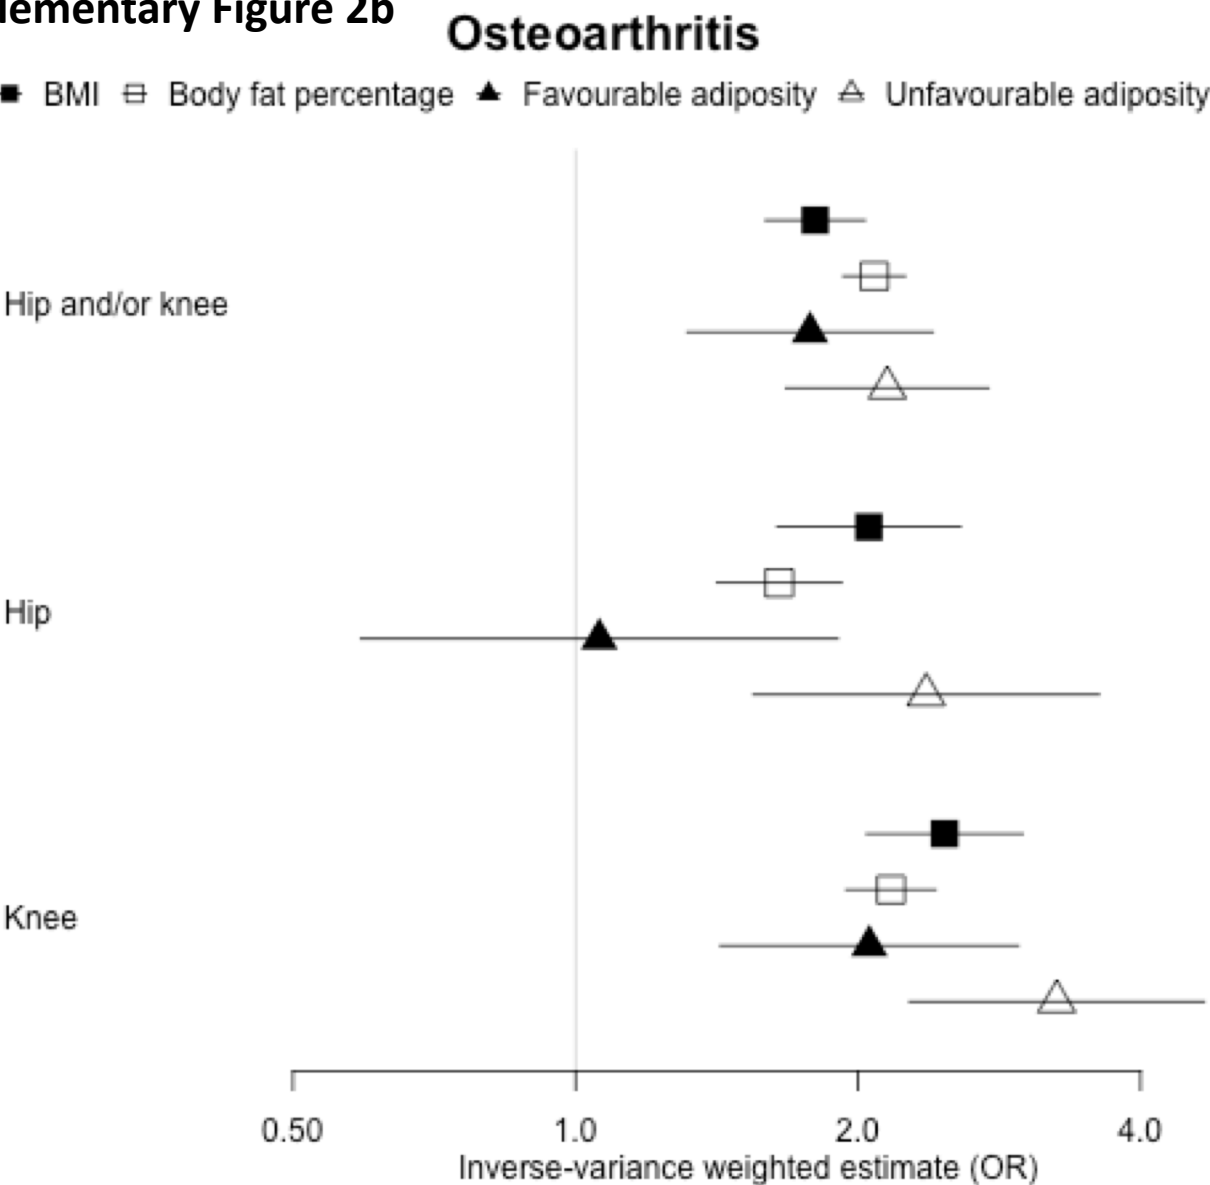

Supplementary Figure 2c

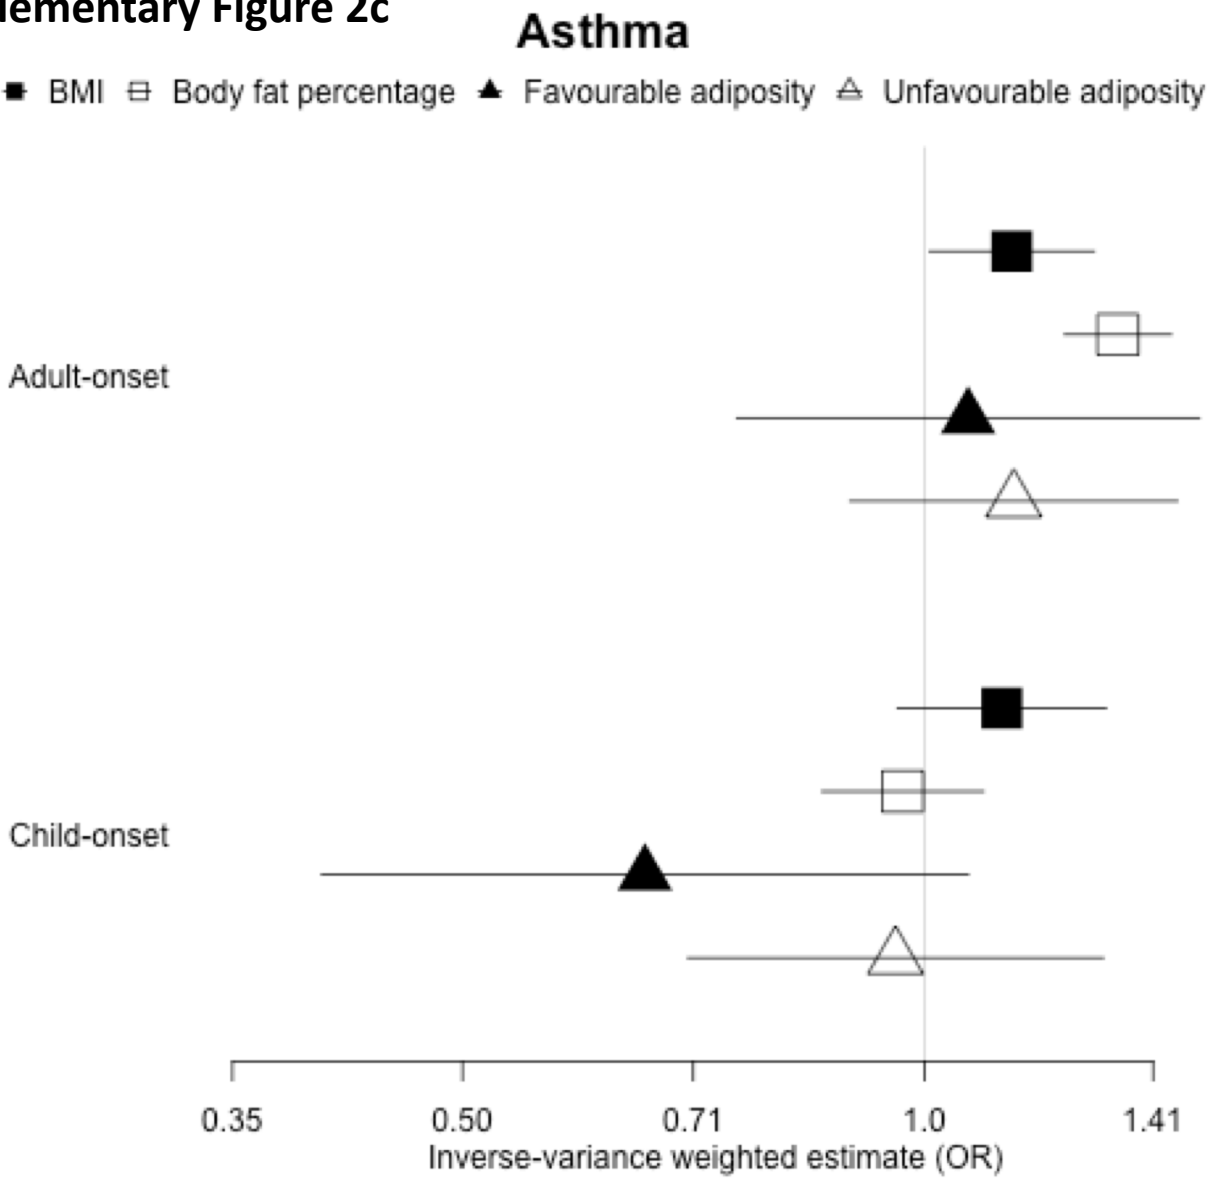

Supplementary Figure 2d

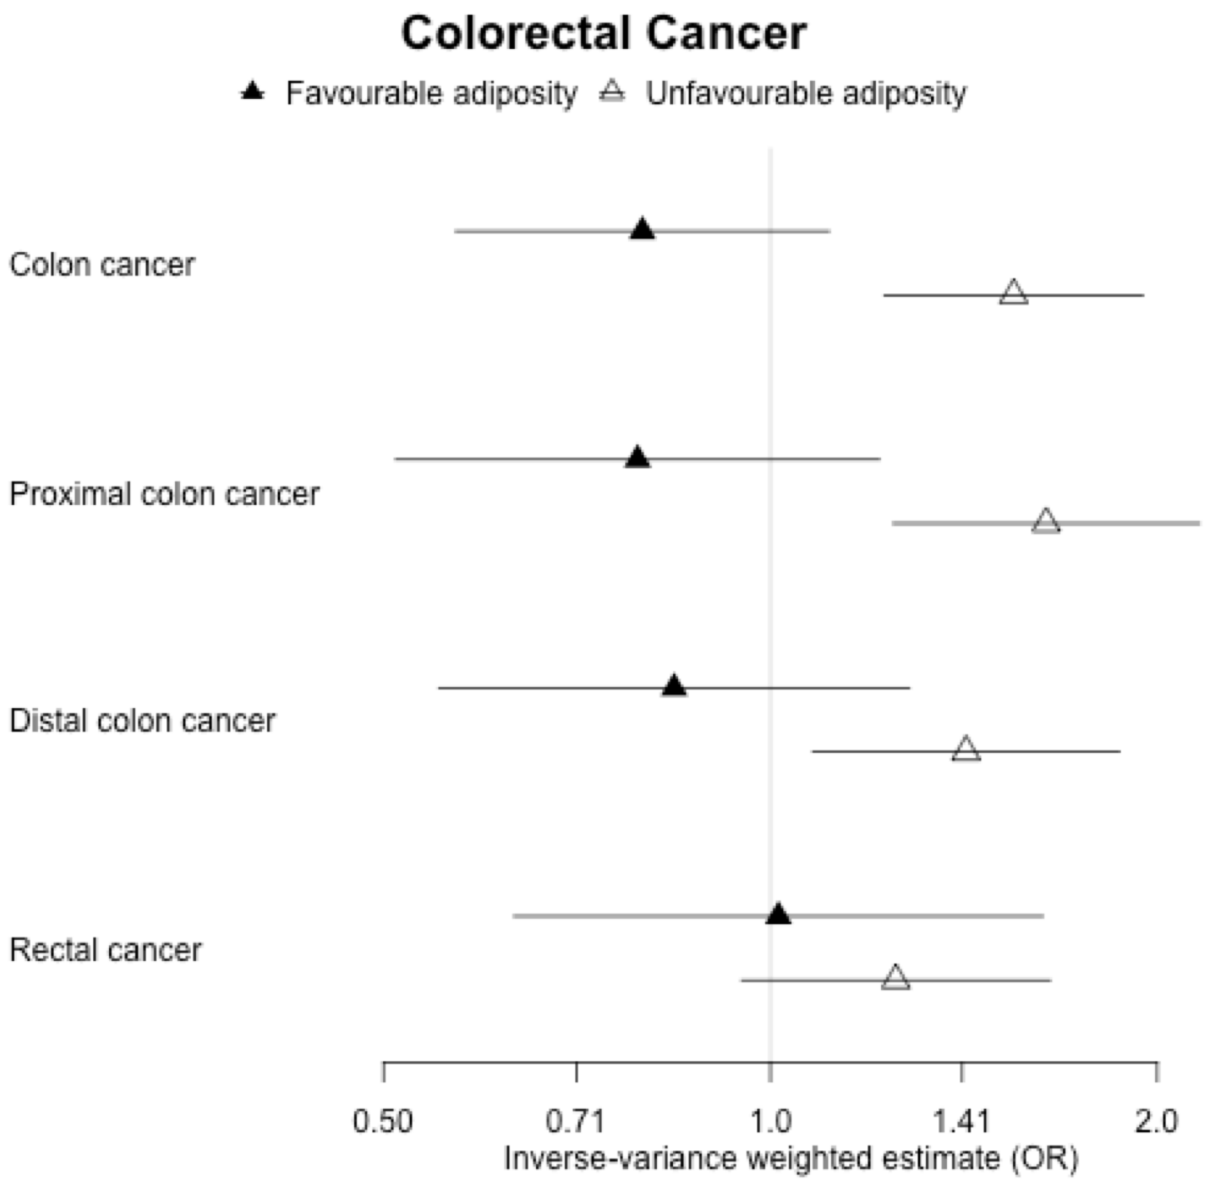

Supplementary Figure 2e

Ovarian Cancer

■ BMI    □ Body fat percentage    ▲ Favourable adiposity    △ Unfavourable adiposity

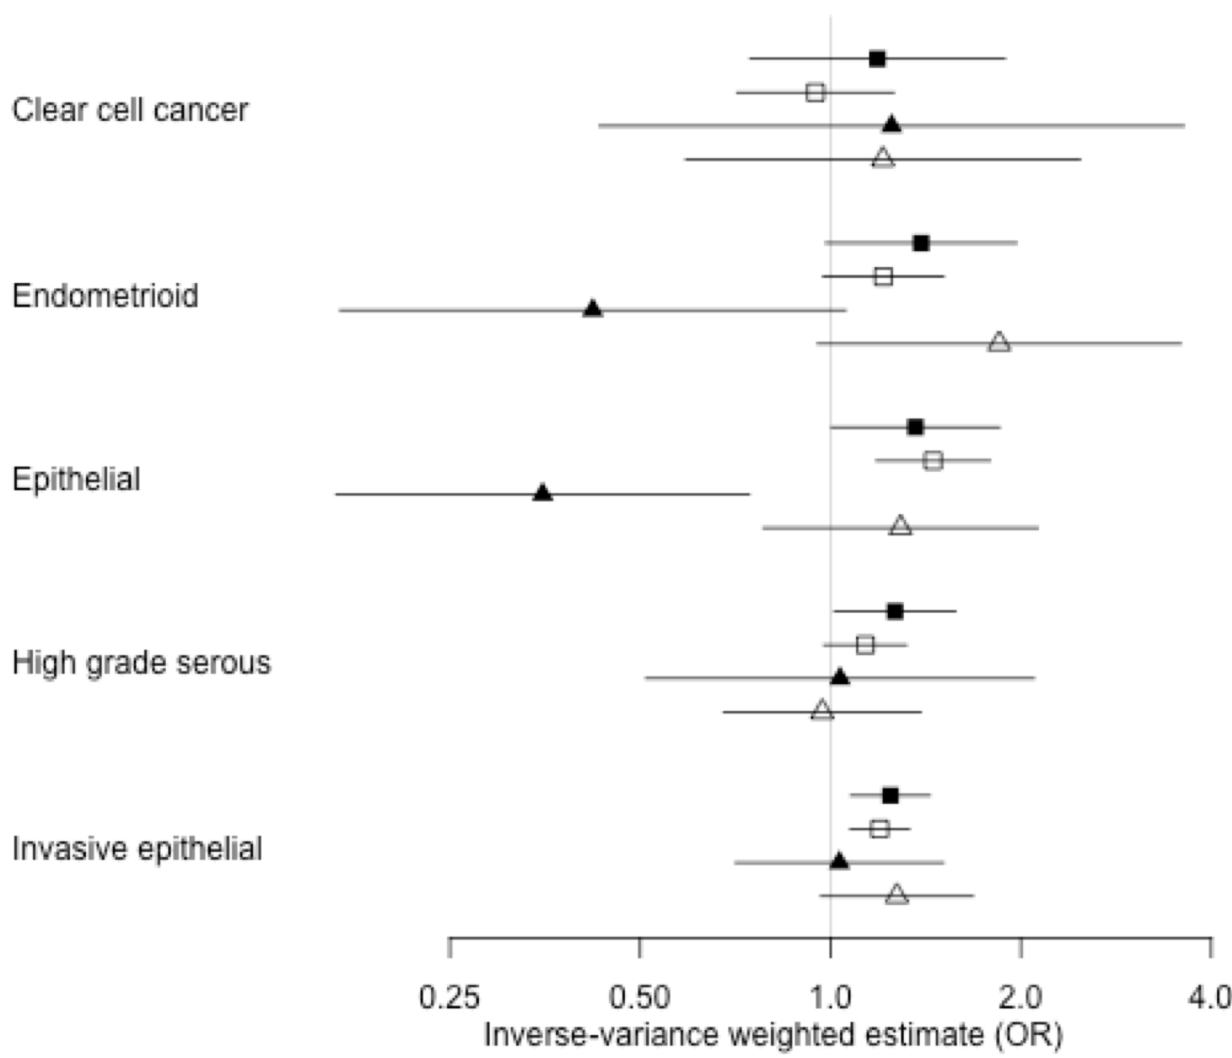

Supplementary Figure 2f

Ovarian Cancer

■ BMI    □ Body fat percentage    ▲ Favourable adiposity    △ Unfavourable adiposity

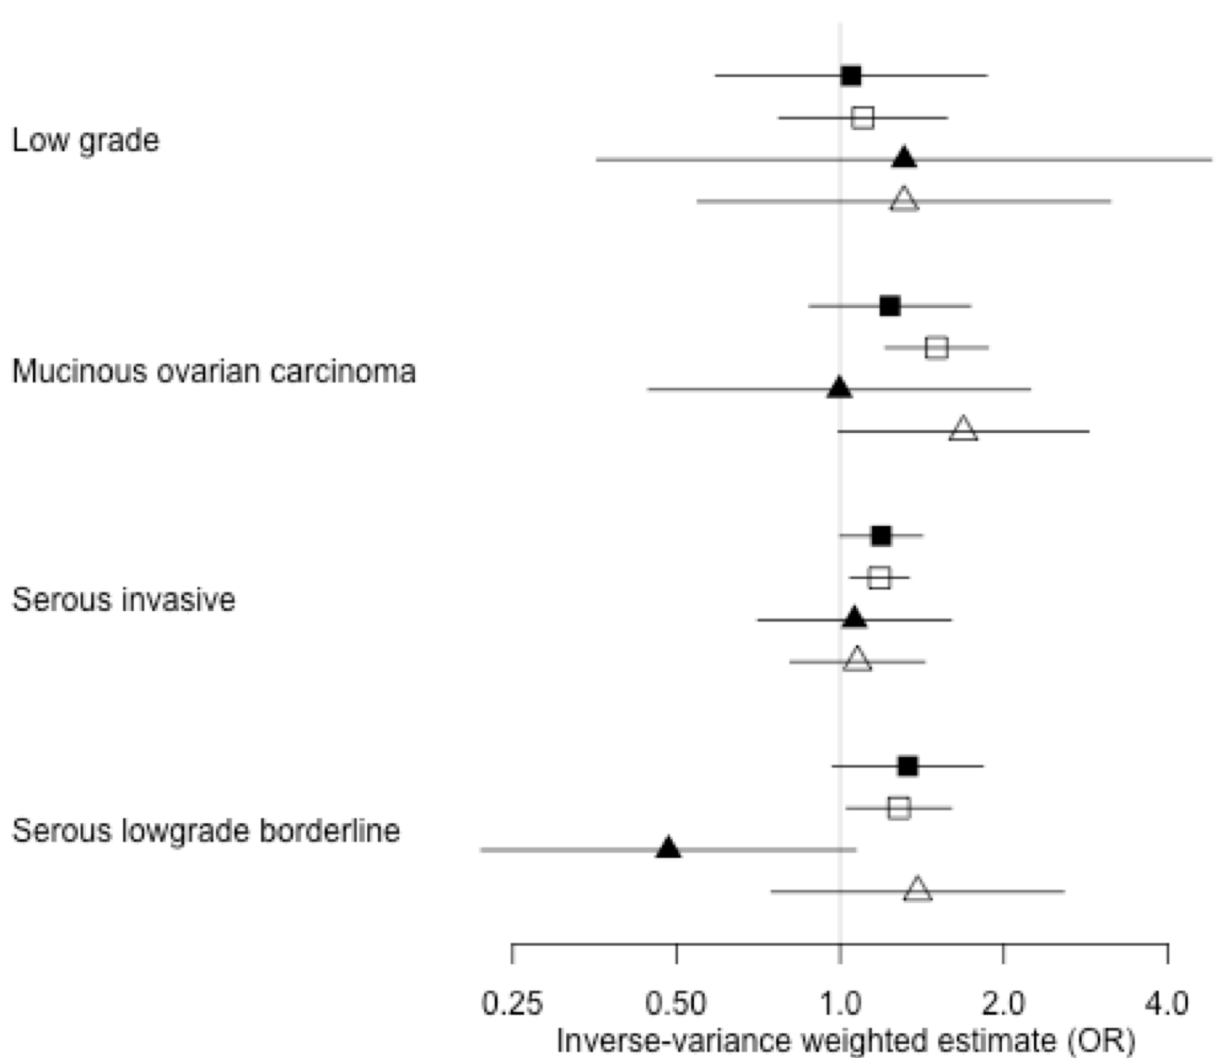

Supplement: Supplementary file 1 [file 391e25db23b2f53347f3829c.pdf]
